# Supplementary material for: Combined Treatment of Sulfonyl Chromen-4-Ones (CHW09) and Ultraviolet-C (UVC) Enhances Proliferation Inhibition, Apoptosis, Oxidative Stress, and DNA Damage against Oral Cancer Cells
Source: PubMed Central journal article supplement (PMC7504536; doi:10.3390/ijms21176443), 2020-09-03
Supplement: ijms-21-06443-s001.pdf [file ijms-21-06443-s001.pdf]

Supplementary Materials

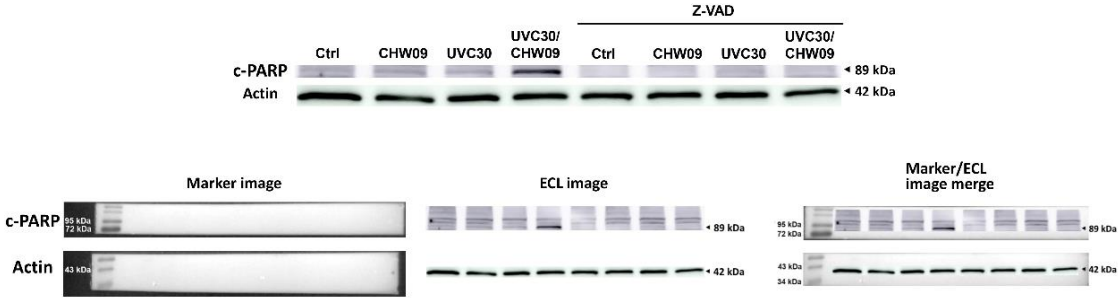

Figure S1. Figure 4D image and its raw data for western blotting.
